1 **Identifying Priority Landscapes for Conservation of Snow Leopards in**  
2 **Pakistan**

3 Shoaib Hameed<sup>1</sup>, Jaffar ud Din<sup>2,3</sup>, Hussain Ali<sup>1</sup>, Muhammad Kabir<sup>1</sup>, Muhammad Younas<sup>2</sup>, Wang  
4 Hao<sup>3</sup>, Richard Bischof<sup>4</sup>, Muhammad Ali Nawaz<sup>1,2\*</sup>

5 <sup>1</sup> Carnivore Conservation Lab, Department of Animal Sciences, Quaid-i-Azam University,  
6 Islamabad, Pakistan

7 <sup>2</sup> Snow Leopard Trust, Pakistan Program, Islamabad,

8 <sup>3</sup> Institute of Biological Sciences, Faculty of Science, University of Malaya, Kuala Lumpur,  
9 Malaysia

10 <sup>3</sup> School of Life Sciences, Peking University, Beijing 100871, China

11 <sup>4</sup> Faculty of Environmental Sciences and Natural Resource Management, Norwegian University  
12 of Life Sciences, Ås, Norway

13 **Running title:** Priority Landscapes for Snow Leopard's Conservation in Pakistan

14 **Total number of tables and figures:** 13

15 **\* Corresponding Author:**

16 Muhammad Ali Nawaz

17 Department of Animal Sciences, Quaid-i-Azam University, Islamabad, Pakistan

18 Ph: +92 51 9064 3155

19 Cell: +92 332 544 4230

20 E-mail: [nawazma@gmail.com](mailto:nawazma@gmail.com)

21 **Abstract**

22 Pakistan's total estimated snow leopard habitat is about 80,000 km<sup>2</sup> of which about half is  
23 considered prime. However, this preliminary demarcation was not always in close agreement  
24 with the actual distribution—the discrepancy may be huge at the local and regional level. Recent  
25 technological developments like camera trapping and molecular genetics allow for collecting  
26 reliable presence records that could be used to construct realistic species distribution based on  
27 empirical data and advanced mathematical approaches like MaxEnt. Current study followed this  
28 approach to construct accurate distribution of the species in Pakistan. Moreover, movement  
29 corridors, among different landscapes, were also identified through the circuit theory. The habitat  
30 suitability map, generated from 384 presence points and 28 environmental variables, scored the  
31 snow leopard's assumed range in Pakistan, from 0 to 0.97. A large shear of previously known  
32 range represented low-quality habitat, including areas in lower Chitral, Swat, Astore and  
33 Kashmir. Conversely, Khunjerab, Misgar, Chapursan, Qurumber, Broghil, and Central  
34 Karakoram represented high-quality habitats. Variables with higher contribution in the MaxEnt  
35 model were precipitation of driest month (34%), annual mean temperature (19.5%), mean diurnal  
36 range of temperature (9.8%), annual precipitation (9.4%) and river density (9.2). The validation  
37 texts suggest a good model fit, and strong prediction power.

38 The connectivity analysis revealed that the population in the Hindukush landscape appears to be  
39 more connected with the population in Afghanistan as compared to other populations in Pakistan.  
40 Similarly, the Pamir-Karakoram population is better connected with China and Tajikistan, while  
41 the Himalayan population was with the population in India.

42 Current study allows for proposing three model landscapes to be considered under GSLEP  
43 agenda as regional priority areas, to safeguard safeguard future of the species in the long run.  
44 These landsapes fall in mountain ranges of the Himalaya, Hindu Kush and Karakoram-Pamir,  
45 respectively. We also identified gaps in existing protected areas network, and suggest new  
46 protected areas in Chitral and Gilgit-Baltistan to protect critical habitats of snow leopard in  
47 Pakistan.

48 **Key words:** snow leopard, distribution, habitat, movement corridor, maxent, circuitscape, model  
49 landscape.

50

## 51 **Introduction**

52 The snow leopard, *Panthera uncia* has obtained an iconic status worldwide and is treated as a flagship  
53 species of the vast ecosystem of the Greater Himalayas [1]. The species is native to the mountain ranges  
54 of Central and Southern Asia—some of the world’s most rugged landscapes [2]. It occurs in the Hindu  
55 Kush, Karakoram, Altai, Sayan, Tien Shan, Kunlun, Pamir, and outer Himalayan ranges, and smaller  
56 isolated mountains in the Gobi region [3,4]. Global range sizes vary from 1.2 million to over 3 million  
57 km<sup>2</sup> [5] and the species is highly threatened throughout its range. A recent study estimated its occupied  
58 range to be about 2.8 million km<sup>2</sup> [6], across 12 countries—Afghanistan, Bhutan, China, India,  
59 Kazakhstan, Kyrgyzstan, Mongolia, Nepal, Pakistan, Russia, Tajikistan and Uzbekistan ([7–9]. Potential  
60 range of snow leopard may also occurs in northern Myanmar, but recent snow leopard presence has not  
61 been confirmed [5].

62         Considering Roberts’ [10] range maps as a base, Pakistan’s total estimated snow leopard habitat  
63 is about 80,000 km<sup>2</sup> of which about half is considered prime [11]. However, this preliminary evaluation  
64 of the snow leopard’s distribution is based on expert judgements, anecdotal information and topographic  
65 elements like terrain. Consequently, these distribution maps were not always in close agreement with  
66 actual distribution—the discrepancy may be huge at the regional and global level [7]. Accurate modelling  
67 of the geographic distribution of species is crucial to various applications in ecology and conservation  
68 [12,13]. Conservationists often need precise assessments of species’ ranges and current species  
69 distribution patterns. Simple range description is essential, but identification of those factors that restrict  
70 distributions is also critical to promote the benefits of conservation management [14].

71         Factors that affect species distributions and habitat selection have great significance to  
72 researchers and wildlife managers. It is important to be aware of the influence of variables on species’  
73 occurrence [15]. There is also a prepared source of environmental information, including global databases  
74 of climate and digital elevation models and species distribution models (SDMs), being used in ecological

75 research and conservation planning [16]. Currently, ecological niche models (ENMs) and SDMs are  
76 increasingly being used to map potential distributions of many species [13]. These models incorporate  
77 species occurrence data with climatic and other environmental variables to produce reliable distribution  
78 maps of species [17] that are used to design scientific surveys and plan sustainable conservation [18]. The  
79 task of a modelling method is to predict the environmental suitability for the species as a function of  
80 given environmental variables [12].

81 Many models like BIOCLIM, BLOMAPPER, DIVA, DOMAIN, CLIMEX, GAM, GLM and  
82 GARP have been used in species distribution modelling [19,20], but maximum entropy (MaxEnt) is  
83 argued to possess the best predictive capacity [21–23] and produces the most accurate distribution  
84 functions [23]. Several studies indicate that MaxEnt modelling performs better than other models [19].  
85 MaxEnt estimates the probability of the presence of a species based on occurrence records and randomly  
86 generates background points by finding the maximum entropy distribution [18,24].

87 These models can use either presence/absence data or presence-only data. The use of  
88 presence/absence data in wildlife management and biological surveys is widespread [25]. By contrast,  
89 absence data is often unavailable and difficult to verify given the potential for a species to be present at a  
90 site but not observed [26]. However, SDMs trained on presence-only data are frequently used in  
91 ecological research and conservation planning [16]. Understanding how predictions from  
92 presence/absence models relate to predictions from presence-only models is important because presence  
93 data is more reliable than absence data [27]. Presence-only modelling methods only require a set of  
94 known occurrences together with predictor variables such as topographic, climatic, and biogeographic  
95 variables [12].

96 Connectivity among habitats and populations is another critical factor that influences variety of  
97 ecological phenomena, including gene flow, metapopulation dynamics, demographic rescue, seed  
98 dispersal, infectious disease spread, range expansion, exotic invasion, population persistence and

99 maintenance of biodiversity [28,29]. Preserving and restoring connectivity is one of the top conservation  
100 priorities and conservation organizations are devoting substantial resources to accomplish these goals  
101 [30,31]. A reliable, efficient and process-based approach is required to achieve this objective in  
102 complex landscapes. A new class of ecological connectivity models based on electrical circuit theory  
103 were introduced by McRae et al. [32]. Resistance, current and voltage calculated across graphs or raster  
104 grids can be associated to ecological processes like; individual movement and gene flow, that take place  
105 across large population networks or landscapes.

106         Given the multitude of threats to snow leopards and their habitat, it is imperative that  
107 comprehensive landscape-level conservation strategies be developed that are based on reliable  
108 information on species survival requirements. A global strategy to safeguard snow leopards and the vast  
109 ecosystem they inhabit—which includes 12 nations and supports 1 billion people—has already been  
110 established: The Global Snow Leopard Ecosystem Protection Program (GSLEP). Its overall aim is to  
111 secure at least 20 snow leopard model landscapes across the cat’s range by 2020 [33]. Under the GSLEP  
112 initiative, the selection of model landscapes requires a clear understanding of areas that represent the  
113 species’ prime habitat so that conservation efforts in the next decade can focus on securing areas that hold  
114 or have potential to hold larger populations. Recent technological developments like camera trapping and  
115 molecular genetics allow for collective reliable presence records that could be used to construct realistic  
116 species distribution based on empirical data and advanced mathematical approaches like MaxEnt. This  
117 study aims to support the GSLEP by identifying core habitats and movement corridors through upgrading  
118 knowledge on snow leopard distribution.

## 119 **Materials and Methods**

### 120 **Study Area**

121 The study focused on known snow leopard range in Pakistan which encompasses four high  
122 mountainous ranges; the Himalaya, Karakoram, Pamir and Hindu Kush spread across three

123 administrative units, i.e. Khyber Pakhtunkhwa (KP), Gilgit-Baltistan (GB) and Azad Jammu and  
124 Kashmir (AJK). Targeting major protected areas and other potentially suitable habitats, we  
125 surveyed 20 sites with a collective area of around 40,000 km<sup>2</sup> (**Fig 1**). The surveyed areas  
126 constitute 50% of reported snow leopard habitat in Pakistan (80,000 sq. km) [34].

127         These glorious mountain ranges are also home to one of the densest collections of high  
128 and precipitous mountain peaks in the world. Their high altitudes and sub-zero temperatures also  
129 make them one of the most heavily glaciated parts of the world outside the polar regions. The  
130 Western Himalayan Range is situated in AJK and GB to the south and east of the Indus River.  
131 The Hindukush rise Southwest of the Pamirs. The Karakoram Range covers the borders between  
132 three countries in the regions of GB in Pakistan, Ladakh in India and the Xinjiang region in  
133 China. They are considered to extend from the Wakhjir Pass at the junctions of the Pamirs and  
134 Karakoram to the Khawak Pass north of Kabul.

135         The mountainous regions of Pakistan are heavily inhabited despite harsh geographic and  
136 climatic conditions. Nevertheless, the special ecological conditions and remoteness of these  
137 mountainous areas also support unique biodiversity of plants and animals. Some of these high  
138 hills harbour 90% of Pakistan's natural forests. Climatic conditions vary widely, ranging from  
139 the monsoon-influenced moist temperate zone in the western Himalayas to the semi-arid cold  
140 deserts of the northern Karakorum and Hindu Kush. Four vegetation zones can be differentiated  
141 along the altitudinal ascents, such as alpine dry steppes, subalpine scrub zones, alpine meadows  
142 and permanent snowfields. Various rare and endangered animals such as the snow leopard  
143 (*Panthera uncia*), grey wolf (*Canis lupus*), brown bear (*Ursus arctos*), Asiatic black bear (*Ursus*  
144 *thibetanus*), Himalayan lynx (*Lynx lynx*), Himalayan Ibex (*Capra ibex sibirica*), blue sheep  
145 (*Pseudois nayaur*), flare-horned markhor (*C. f. cashmirensis*), musk deer (*Moschus*

146 *chrysogaster*), Marco Polo sheep (*Ovis ammon polii*), Ladakh urial (*Ovis orientalis vignei*)  
147 Pallas's cat  
148 (*Otocolobus manual*) and woolly flying squirrel (*Eupetaurus cinereus*), inhabit in these varied  
149 climatic conditions and ecosystems.

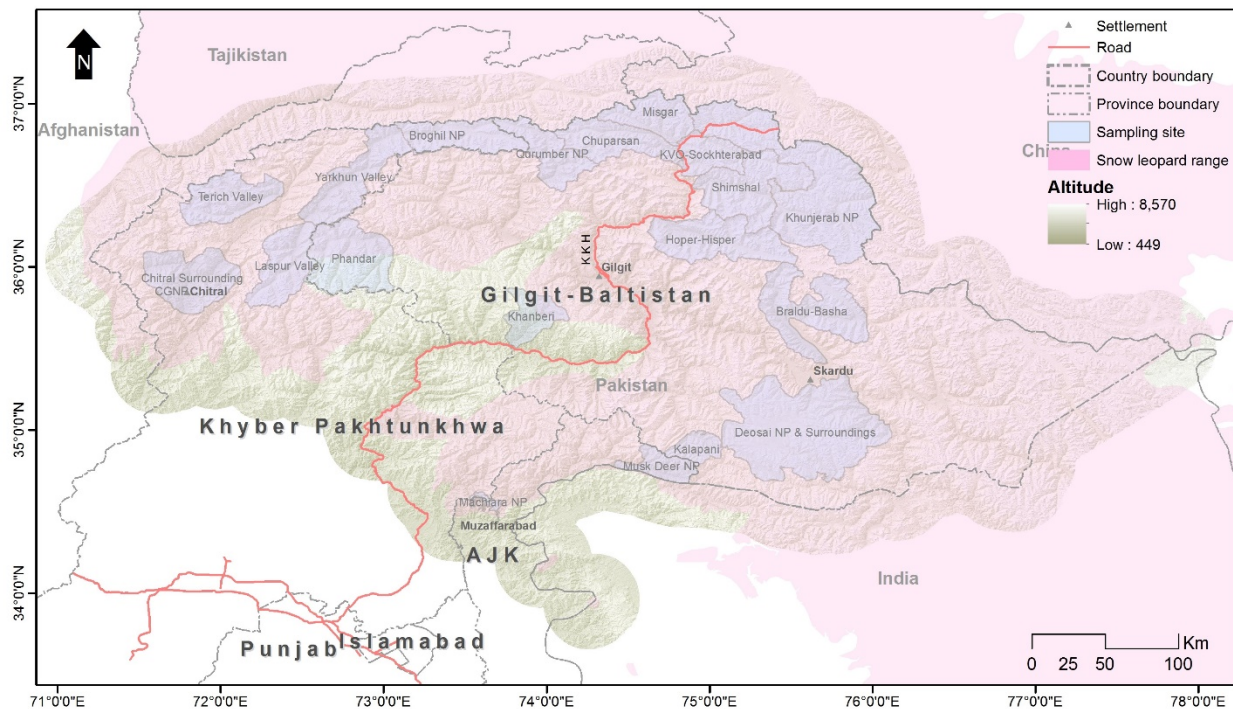

150 **Fig 1. Map of study area showing sampling sites and IUCN range of snow leopard in**  
151 **Pakistan**

## 152 **Data Collection**

153 Presence records were collected by three methods: camera trapping, sign surveys and genetic  
154 sampling. Camera trapping is being increasingly adopted for the monitoring of shy and rare  
155 wildlife [35–37]. We deployed 806 camera stations in Chitral Gol National Park (CGNP), the  
156 buffer areas of CGNP and Tooshi Game Reserve (TGR), TGR, Laspur Valley, Khunjerab  
157 National Park (KNP), Shimshal, Khunjerab Villagers Organization (KVO) area, Qurumber  
158 National Park, Broghil National Park, Deosai National Park, Yarkhun Valley, Misgar, Astor,  
159 Musk Deer National Park, Khanberi Valley, Terich Valley, Hoper-Hisper, Basha and Arandu and



160 buffer areas of Central Karakoram National Park (CKNP), during the period 2006–2017 (**Fig 1**).  
161 These cameras remained active for more than 20,000 trap-days in the field. The camera brands  
162 used were CamTrakker™ (Ranger, Watkinsville, GA, USA) and Reconyx™ (HC500  
163 Hyperfire™ and PC900 Hyperfire™; Reconyx, Holmen, Wisconsin, USA). The sites for camera  
164 installation were selected near tracks, scrapes, scats, and other signs. A minimum aerial distance  
165 of 1 km was kept between the two nearest camera stations. All essential procedures, safety  
166 measures and standards—camera height, front view, sensors, etc.—were followed whilst setting  
167 the cameras up, as per Jackson et al. [36]. The majority of the camera stations were supplied with  
168 different type of lures—castor, skunk and fish oil—to enhance capture probability.

169 Site Occupancy based sign surveys were conducted in KNP-KVO-Shimshal, Qurumber-  
170 Broghil national parks, Misgar-Chapursan, Phandar Valley, and Basha-Arandu from 2010 to  
171 2017. Each study area was divided into small grids cells of  $5 \times 5$  km—except in KNP-KVO-  
172 Shimshal where we kept grid size to  $10 \times 10$  km) on GIS maps. Each grid cell (site) was  
173 approached by GPS and multiple points were led to search the signs for snow leopards. A total of  
174 193 sites with 1,607 repeat survey points were searched for signs of snow leopards. Presence was  
175 detected through five types of signs (scrapes, pugmarks, faeces, scent spray and claw marks).  
176 However, in this analysis, we used just two types of signs, i.e. scrapes and pugmarks, as these are  
177 considered more reliable [38].

178 Faecal samples were collected from 2009 to 2013 during the sign and camera trap  
179 surveys. We collected over 1,000 faecal samples of all carnivore species encountered in the field  
180 and preserved them in 95% alcohol in 20 ml bottles. The DNA extraction was performed in a  
181 laboratory dedicated to the extraction of degraded DNA. Total DNA was extracted from c. 15  
182 mg of faeces using the DNeasy Blood and Tissue Kit (QIAGEN GmbH, Hilden, Germany)

183 following the maker's guidelines with a small modification as explained by Shehzad et al. [39].  
184 Blank extractions were performed to scrutinize contamination. Species identification was  
185 performed through next generation sequencings (NGS) by amplifying DNA extract using primer  
186 pair 12SV5F (5'-TAGAACAGGCTCCTCTAG-3') and 12SV5R (5'- TTAGATACCC  
187 CACTATGC-3' targeting about 100-bp of the V5 loop of the mitochondrial 12S gene [37,39]  
188 The sequence analysis and taxon assignation were done using OBITools as described in Shehzad  
189 et al. [39,40].

## 190 **Data Analysis**

191 We used MaxEnt modelling [24] to predict snow leopard distribution in Pakistan. MaxEnt is a  
192 freely available programme, and we used version 3.3.3k from  
193 [www.cs.princeton.edu/~schapire/maxent](http://www.cs.princeton.edu/~schapire/maxent). It predicts species distribution using presence-only  
194 data and environmental variables, and estimates species' probability distribution by finding the  
195 probability distribution of maximum entropy, i.e. the most spread out or closest to uniform,  
196 subject to a set of constraints [24]. It is amongst the most popular species distribution modelling  
197 methods with more than 1,000 published usages since 2005[13,41]. MaxEnt has also surpassed  
198 other methods and exhibited higher predictive accuracy [42].

199 We used a random seed option and kept 25% data for random tests—25 replicates were  
200 run with typeset as a subsample. The rest of the settings were kept as default, which included a  
201 maximum of 10,000 background points, 5,000 maximum iterations with a convergence threshold  
202 of 0.00001, and a regularization multiplier of 1.

## 203 *Data Preparation*

204 We used snow leopard range with an added buffer of 30 km to model under MaxEnt. All  
205 environmental layers were converted to the same size (extent) and resolution, i.e. 1 × 1 km, using

206 ‘resample’, ‘clip’ and ‘mask’ tools in ArcGIS 10.2. Snow leopard occurrence points were also  
 207 converted into a grid file. All environmental variables and presence points were then converted  
 208 into ASCII files as required by MaxEnt, by using the ‘conversion’ tool in Arc GIS 10.2. Features  
 209 in Maxent are derived from two types of environmental variables: continuous and categorical  
 210 [12].

211 Among the 28 variables considered initially, 11 environmental variables were retained  
 212 after a multicollinearity test (Table 2.1), including 4 bioclimatic variables (bio1, bio2, bio12, and  
 213 bio14), distances from river, roads and settlements, slope, ruggedness, soil and a normalized  
 214 difference vegetation index (NDVI) [37]. Bioclimatic variables were derived from the mean  
 215 temperature, minimum temperature, maximum temperature and precipitation in order to generate  
 216 more biologically meaningful variables—these are often used in ecological niche modelling.  
 217 Details of each variable used and their sources are shown in **Table 1**.

218 **Table 1. List of environmental variables used in MaxEnt modelling.**

| <i>Environmental variable</i> | <i>Interpretation</i>                                      | <i>Source</i>                                                                                                               |
|-------------------------------|------------------------------------------------------------|-----------------------------------------------------------------------------------------------------------------------------|
| bio1                          | Annual mean temperature                                    | <a href="http://www.worldclim.org">http://www.worldclim.org</a>                                                             |
| bio2                          | Mean diurnal range (mean of monthly [max temp - min temp]) | <a href="http://www.worldclim.org">http://www.worldclim.org</a>                                                             |
| bio12                         | Annual precipitation                                       | <a href="http://www.worldclim.org">http://www.worldclim.org</a>                                                             |
| bio14                         | Precipitation of driest month                              | <a href="http://www.worldclim.org">http://www.worldclim.org</a>                                                             |
| Slope                         | Slope of the area                                          | derived from alt in Arc GIS 10.2                                                                                            |
| River                         | Density of rivers (m)                                      | calculated in Arc GIS 10.2                                                                                                  |
| Road                          | Density of roads (m)                                       | calculated in Arc GIS 10.2                                                                                                  |
| Settlement                    | Density of settlements (m)                                 | calculated in Arc GIS 10.2                                                                                                  |
| ndvi (MODIS)                  | Normalized difference vegetation index                     | NASA: <a href="http://modis-land.gsfc.nasa.gov/vi.html">http://modis-land.gsfc.nasa.gov/vi.html</a>                         |
| Soil                          | Digital soil map of the world                              | FAO, 2003                                                                                                                   |
| Vrmint                        | Vector ruggedness measure                                  | Generated from SRTM 90m DEM by the Center for Nature and Society, Peking University using the Terrain Ruggedness (VRM) Tool |

219

220 *Model Evaluation*

221 The fit or accuracy of the model should be tested, for every modelling approach, to determine its  
222 significance. This can be done in two ways: 1) through receiver operating characteristic (ROC)  
223 plots, and 2) defined thresholds [15]. We used both approaches to determine model accuracy.

224 Model robustness is commonly evaluated by area under the curve (AUC) values of the  
225 ROC [43] that range from 0 to 1—AUC values in the range 0.5–0.7 are considered low, 0.7–0.9  
226 moderate, and 0.9, high [44,45]. Values close to 0.5 indicate a fit no better than that expected by  
227 random, while a value of 1.0 indicates a perfect fit. It is also possible to have values less than  
228 0.5—this indicates that a model fits worse than random [46]. It is a graded approach for  
229 evaluating model fit that verifies the probability of a presence location being graded higher than  
230 a random background locations that serve as pseudo-absences for all analyses in MaxEnt [24].  
231 The AUC quantify the significance of this curve and we used its values to determine model  
232 accuracy. ROC is a plot of the sensitivity vs. 1-specificity over the entire range of threshold  
233 values between 0 and 1 [47]. Using this method, the commission and omission errors are,  
234 therefore, weighted with equal importance for determining model performance [48].

235 Another approach entails selecting thresholds to determine sites that are considered  
236 suitable or unsuitable for the species of interest. These thresholds are established by maximizing  
237 sensitivity while minimizing specificity [24]. The proportion of sites that are precisely  
238 categorized as suitable locations can be compared to the proportion of unsuitable sites to verify  
239 model accuracy. We checked our model output against different defined thresholds and selected  
240 the one with the lowest error.

241 Presence locations excluded by the collinearity model were used for model evaluation  
242 along with absence locations. Absence locations were obtained in two ways, a) from surveyed

243 sites where snow leopards were not detected (214 locations), and b) through 102 locations which  
244 were extracted from areas higher than 6,500 m—no-go areas for snow leopards [6] (Figure 2.2).

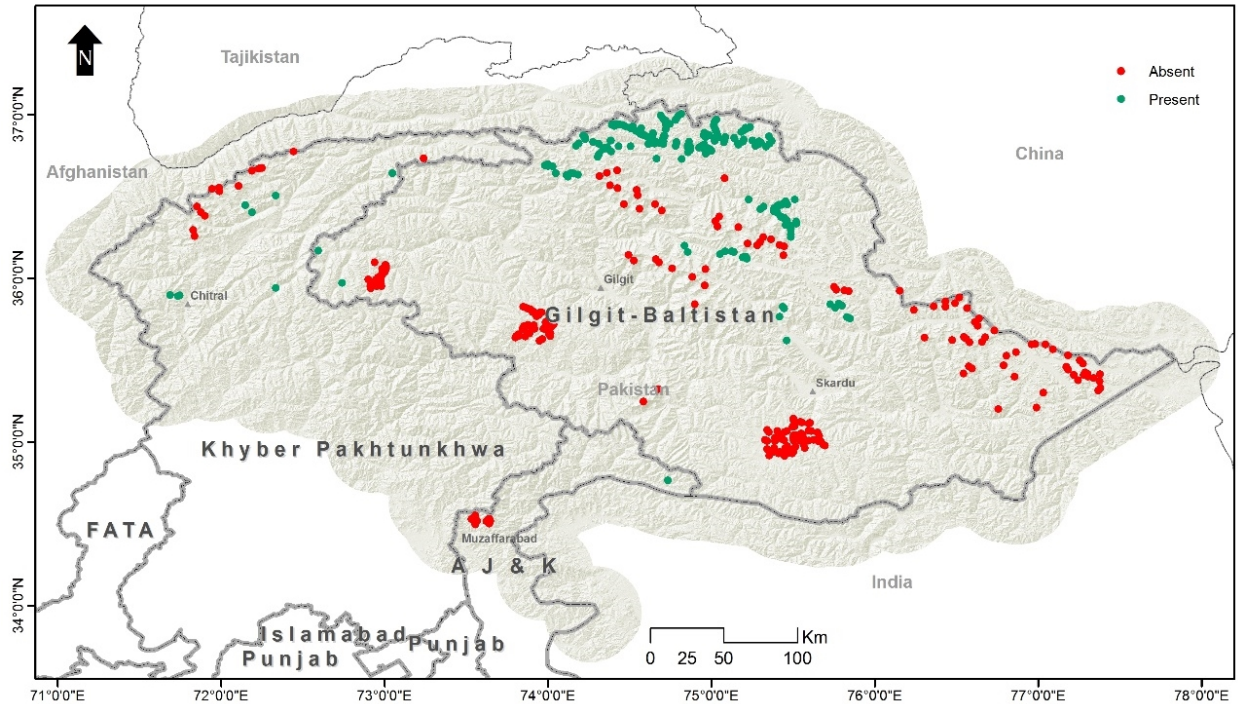

245 **Fig 2. Presence and absence locations of snow leopards used for model evaluation.**

### 246 **Modelling Potential Movement Corridors**

247 Using the snow leopard distribution map generated by MaxEnt, we also modelled for potential  
248 movement corridors. This was achieved through Circuitscape 4.0 (software) [49], an open-source  
249 programme that uses circuit theory to predict connectivity in heterogeneous landscapes for  
250 individual movement. We use pairwise modelling mode which iterates across all pairs in a focal  
251 node file. We selected 38 points from different locations and converted them into a grid file in  
252 ArcGIS 10.2. Both habitat suitability map (created by MaxEnt) and points files were converted  
253 into ASCII format for a Circuitscape model run. We used the option of conductance instead of  
254 resistance because, in our model, higher values indicate greater ease of movement and generated  
255 cumulative and max current maps, only.

## 256 **Results**

257 Snow leopard detection was low as it was photo-captured in 97 capture events at just 60 stations  
258 (out of 806 stations) (**Fig 3**). In the majority of our study areas, there was either single capture—  
259 Laspur Valley, Qurumber National Park, Musk Deer National Park, Terich Valley—or no  
260 capture (Broghil National Park, Deosai National Park, Yarkhun Valley, etc.). Multiple captures  
261 occurred only in the Khunjerab National Park, Shimshal, and Misgar valleys, Hoper-Hisper, and  
262 buffer areas of Central Karakoram National Park.

263 In sign-based site-occupancy surveys, signs older than ten days were also excluded to  
264 avoid misperception. After this screening, we obtained 213 locations in different areas with fresh  
265 signs—either scraped or pugmarks, or both. Among 1,000 faecal samples, a genetic analysis  
266 confirmed 111 to be of snow leopards. Combining all three methods, we obtained 384 (Figure  
267 3.1) confirmed locations of snow leopards. These locations were overlapping in some areas  
268 where multiple surveys were conducted. Records obtained by signs, scats and camera trappings  
269 were screened in SDMtoolbox, a tool of GIS, to remove spatially correlated data points to  
270 guarantee independence [50–52] After this selection, 98 unrelated locations were used to  
271 generate current SDMs of the snow leopard.



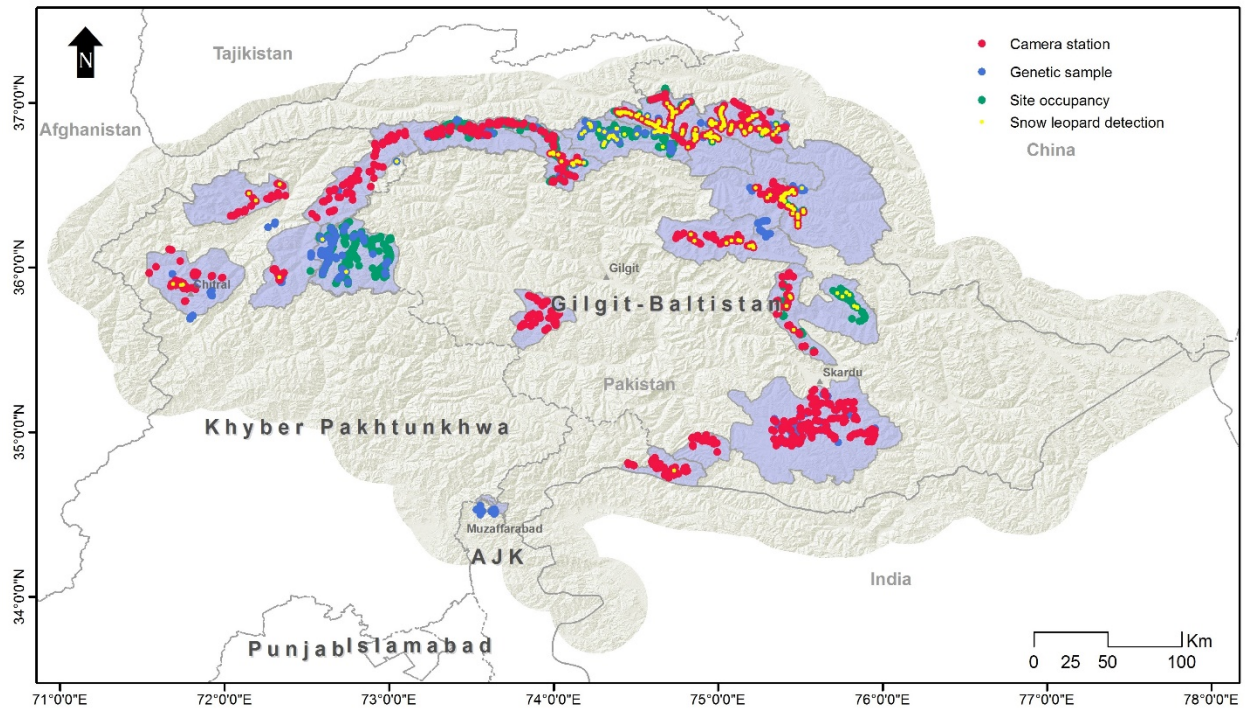

272 **Fig 3. Sampling locations by different survey techniques and snow leopard detections.**

### 273 **Range-wide Habitat Suitability**

274 MaxEnt produced outputs for 25 replicates and averaged them into one model along with  
275 response curves and AUC. This average model was used for interpreting habitat suitability and  
276 calculating potential movement corridors.

277 The habitat suitability score calculated by MaxEnt ranged from 0 to 0.97 across the snow  
278 leopard's assumed range in Pakistan (**Fig 4**). A large shear of previously known range  
279 represented low-quality habitat, including areas in lower Chitral, Swat, Astor and A J K.  
280 Conversely, KNP, Misgar, Chapursan, Qurumber National Park, Broghil National Park, and  
281 CKNP represented high-quality habitats.

282

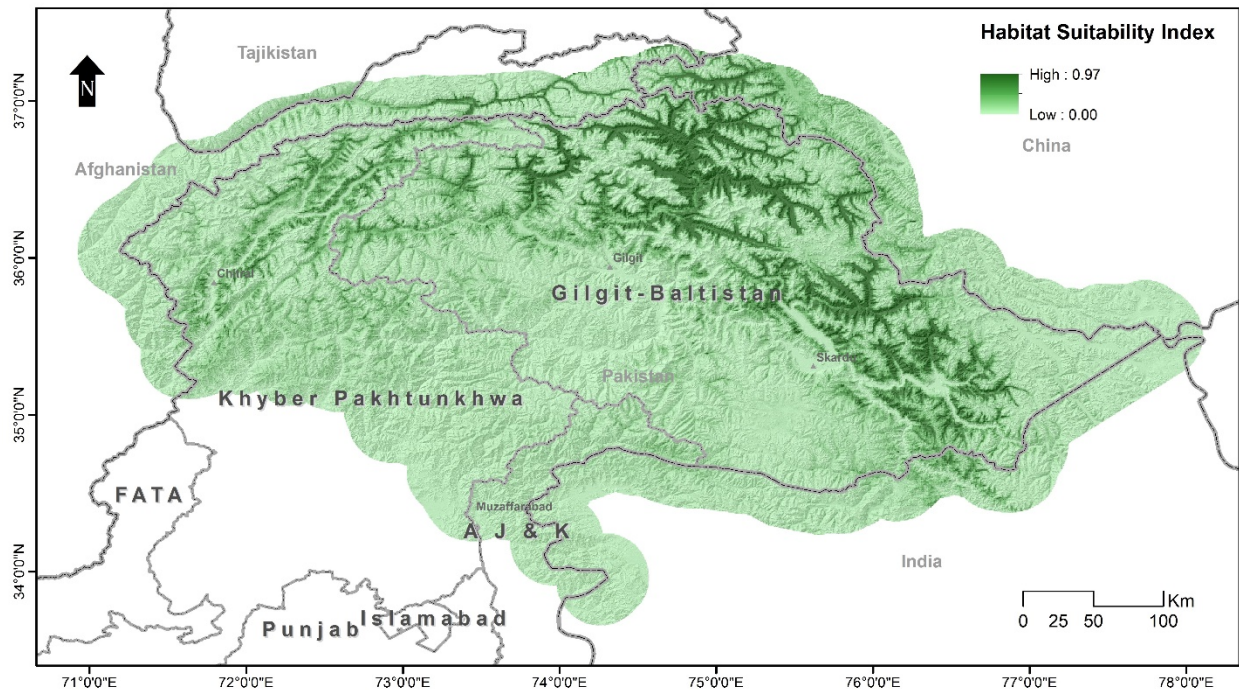

283 **Fig 4. Habitat suitability of snow leopards in Pakistan, calculated with MaxEnt.**

#### 284 **Factors Determining Habitat Suitability**

285 Variables with higher contribution in the MaxEnt model were precipitation of driest month  
286 (34%), annual mean temperature (19.5%), mean diurnal range of temperature (9.8%), annual  
287 precipitation (9.4%) and river density (9.2). The contribution of other variables included in the  
288 model was low (**Table 2**).

289 The Jackknife Test of variable importance showed that the environmental variable with  
290 the highest gain when used in isolation is density of river, which, therefore, appears to have the  
291 most useful information by itself. The environmental variable that decreased the gain the most  
292 when it was omitted was annual mean temperature (bio1), which, therefore, appears to have the  
293 most information that is not present in other variables. The values shown are averages over  
294 replicate runs. (**Fig 4**).



295 **Table 2. Estimates of relative contributions of the environmental variables to the Maxent**  
 296 **model.**

| <i>Variable</i> | <i>Interpretation</i>                                      | <i>Percent contribution</i> | <i>Permutation importance</i> |
|-----------------|------------------------------------------------------------|-----------------------------|-------------------------------|
| bio14           | Precipitation of driest month                              | 34                          | 7.5                           |
| bio1            | Annual mean temperature                                    | 19.5                        | 21.8                          |
| bio2            | Mean diurnal range (mean of monthly [max temp - min temp]) | 9.8                         | 4.3                           |
| bio12           | Annual precipitation                                       | 9.4                         | 61.8                          |
| river           | Density of rivers                                          | 9.2                         | 0.2                           |
| road            | Density of roads                                           | 5.6                         | 2.5                           |
| soil            | Soil                                                       | 5.5                         | 0.9                           |
| vrmint          | Vector ruggedness measure                                  | 5.2                         | 0.6                           |
| settlement      | Density of Settlement                                      | 0.9                         | 0.3                           |
| slope           | Slope of the area                                          | 0.7                         | 0.1                           |
| ndvi            | Normalized difference vegetation index                     | 0.2                         | 0.1                           |

297

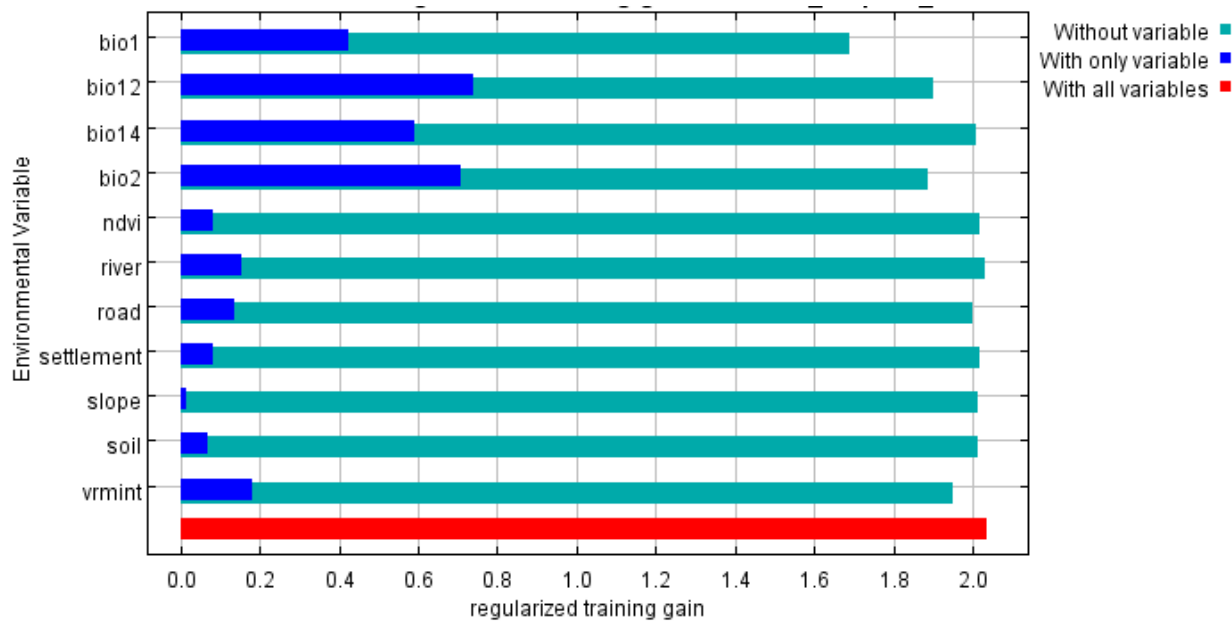

298

299 **Fig 5: Jackknife test of regularized training gain of variables tested in snow leopard habitat**  
 300 **suitability model.**

301 **Model Evaluation and Threshold Selection**

302 MaxEnt performed some basic statistics on the model and calculated an averaged AUC for the  
 303 model. Analysis of omission/commission was done by MaxEnt and Figure 3.6a shows the test  
 304 omission rate and predicted area as a function of the cumulative threshold averaged over the

305 replicate runs. The omission rate should be close to the predicted omission because of the  
306 definition of the cumulative threshold and, in our case, is very close to the predicted one.

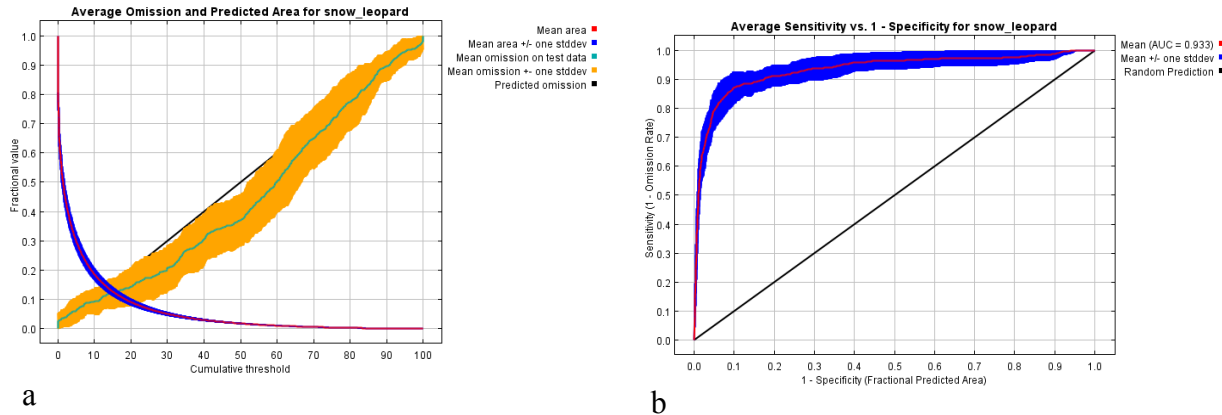

**Fig 6. Model evaluations, (a)Averaged omission and predicted area for snow leopard, (b) The ROC curve calculated by MaxEnt as averaged sensitivity versus 1-specificity for snow leopard.**

307 The ROC curve (**Fig 6b**) for the data was also calculated by MaxEnt, again, averaged  
308 over the replicate runs. Here, specificity is defined using predicted area rather than true  
309 commission [24]The average test AUC for the replicate runs was 0.933 and the standard  
310 deviation was 0.024.

311 Measuring the error of false positive (FP) and false negative (FN) rates against a range of  
312 defined thresholds (Figure 3.8), the lowest error was found at a threshold of 0.15. The binomial  
313 map was re-evaluated by plotting presence and absence points and it showed that almost all  
314 presence points were in suitable habitat areas and absence points in unsuitable areas. The values  
315 of 235 presence points and 316 absence points were extracted from the model and plotted against  
316 different thresholds. The value of AUC by ROC curve calculated at 0.15 was 1.000; which  
317 means our model performed very well.

318 It was calculated that 235 points were true positives (TPs) and 275 were true negatives  
319 (TNs), while FPs were 41 and FNs were 0. The true positive rate (TPR) was calculated at 1.000

320 while the false positive rate (FPR) was 0.130. Accuracy and specificity were calculated at 0.926  
321 and 0.870, respectively, while the positive predictive value (PPV) was found to be 0.851 and the  
322 negative predictive value (NPV) was 1.000. The false discovery rate (FDR) was calculated at  
323 0.149.

324

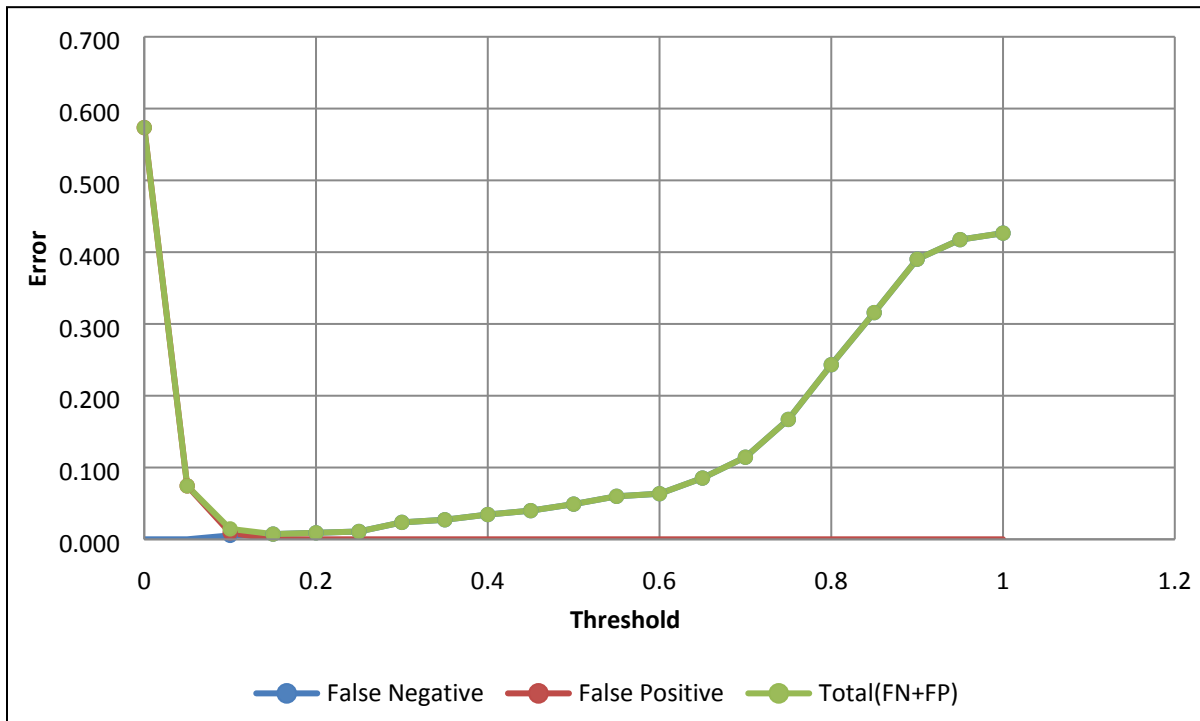

325 **Fig 7. Graph showing the relationship of False Negative and False Positive rates against**  
326 **different thresholds of model prediction.**

### 327 **Potential Movement Corridors of the Snow Leopard**

328 The circuit model (**Fig 8**) revealed an interesting pattern with respect to the snow leopard's  
329 habitat connectivity. The population in the Hindukush landscape appears to be more connected  
330 with the population in Afghanistan as compared to other populations in Pakistan. Similarly, the  
331 Pamir-Karakoram population is better connected with China and Tajikistan, and the Himalayan  
332 population with the population in India.

333 We observed that Chitral had weak connections with other areas when we examined  
334 habitat connectivity in Pakistan. However, the populations of Phandar, Laspur Valley and  
335 Yarkhun Valley seemed connected. Interestingly, Broghil National Park had a weak connection  
336 with its adjacent Qurumber National Park, but had strong links with Yarkhun Valley, while  
337 Qurumber National Park had strong links with Chapursan which is connected to Misgar, which  
338 had a strong link with KNP. The populations of CKNP and Musk Deer National Park were also  
339 shown to be isolated from others and the latter did not even have any movement corridors close  
340 to it.

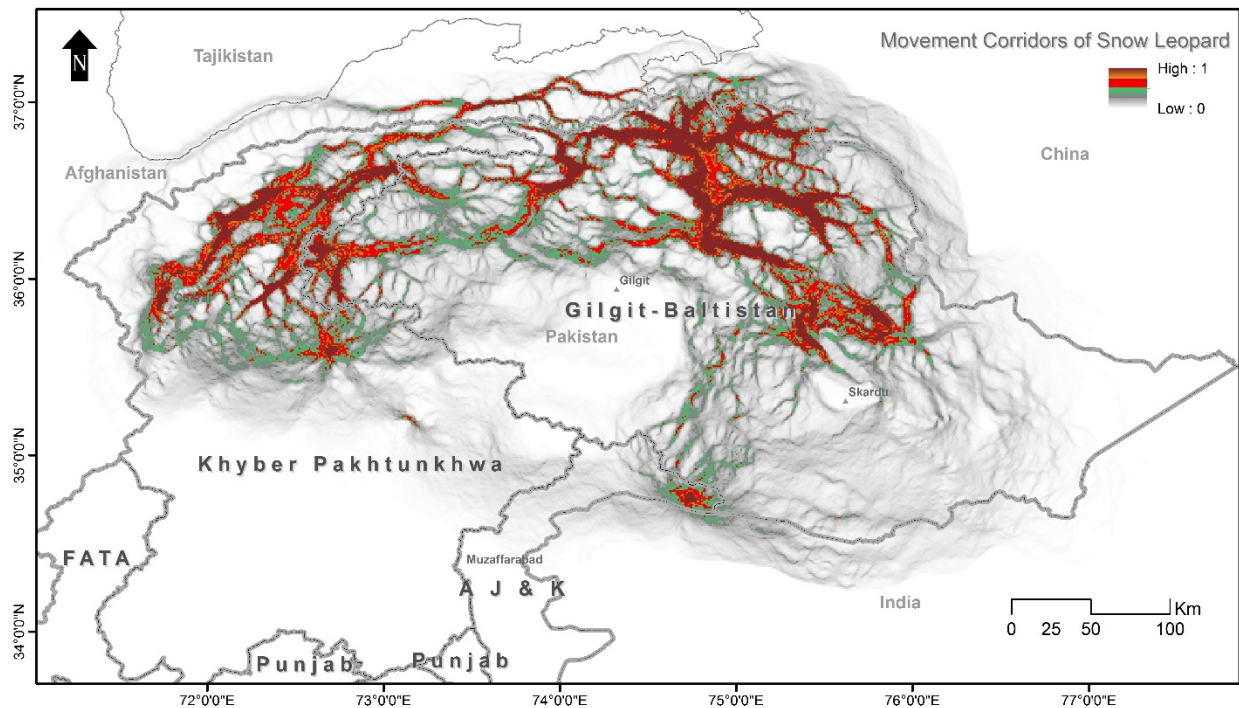

341 **Fig 8. Potential movement corridors of snow leopards in northern Pakistan calculated**  
342 **through Circuitscape.**

### 343 **Protected Areas Coverage in Snow Leopard's Habitat in Pakistan**

344 Habitat Suitability model was also assessed against current protected area coverage (**Fig 9**). It  
345 was revealed that most of the the suitable habitat of snow leopard in Paksitan has already been

346 protected, however there are some areas like Misgar, Chipursan and Terich that are outside of  
347 any declared protected area.

348 It was also observed that most of the national parks had weak links with regards to  
349 movement of snow leopard across different habitats (**Fig 10**). Even some adjacent protected  
350 areas, like; Broghil-Qurumber National Parks and Khujerab-Central Karakoram National Parks  
351 had no or very weak movement corridors of snow leopard at their shared borders.



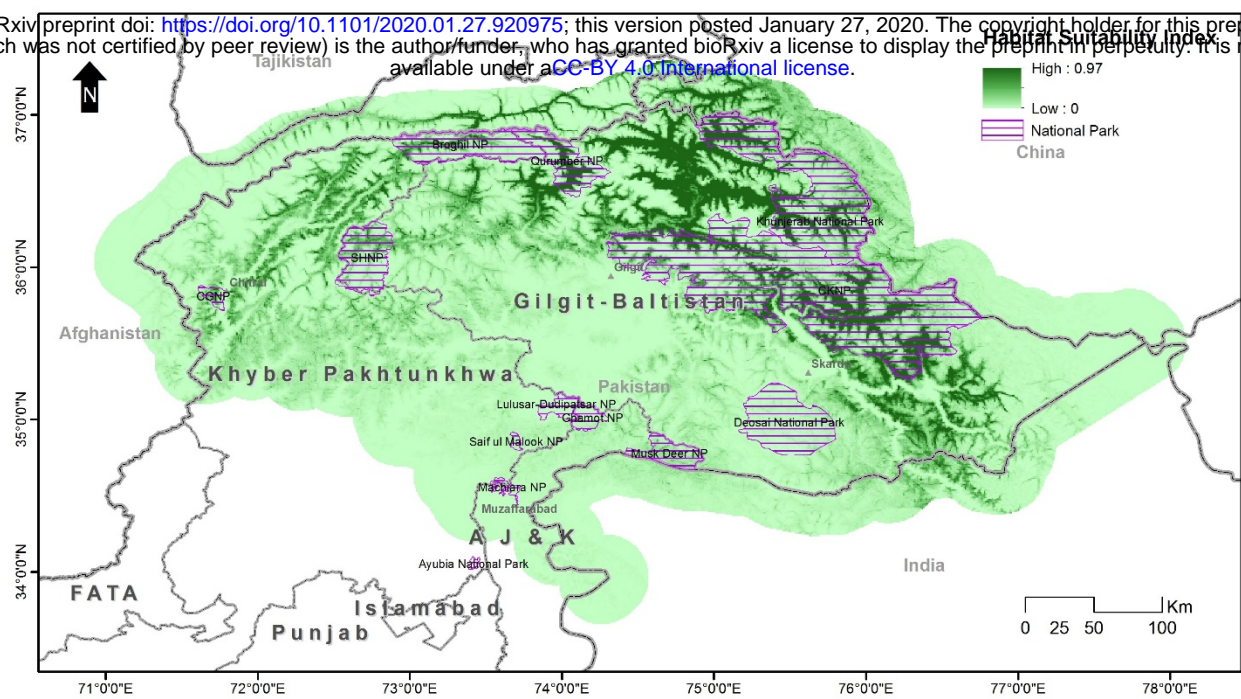

**Fig 9. Snow leopard habitat versus protected area coverage.**

352

353

## 354 Discussion

355 This is the first known study on the snow leopard's distributional patterns and habitat  
 356 connectivity in Pakistan—it revealed some interesting facts about the species' habitat in  
 357 Pakistan. It was observed that the cat's distributional range mentioned in Roberts [10] and Fox  
 358 [11] had very weak scientific grounds, which was obvious due to the lack of data available at the  
 359 time. We recorded snow leopard presence using multiple techniques and discarded all ambiguous

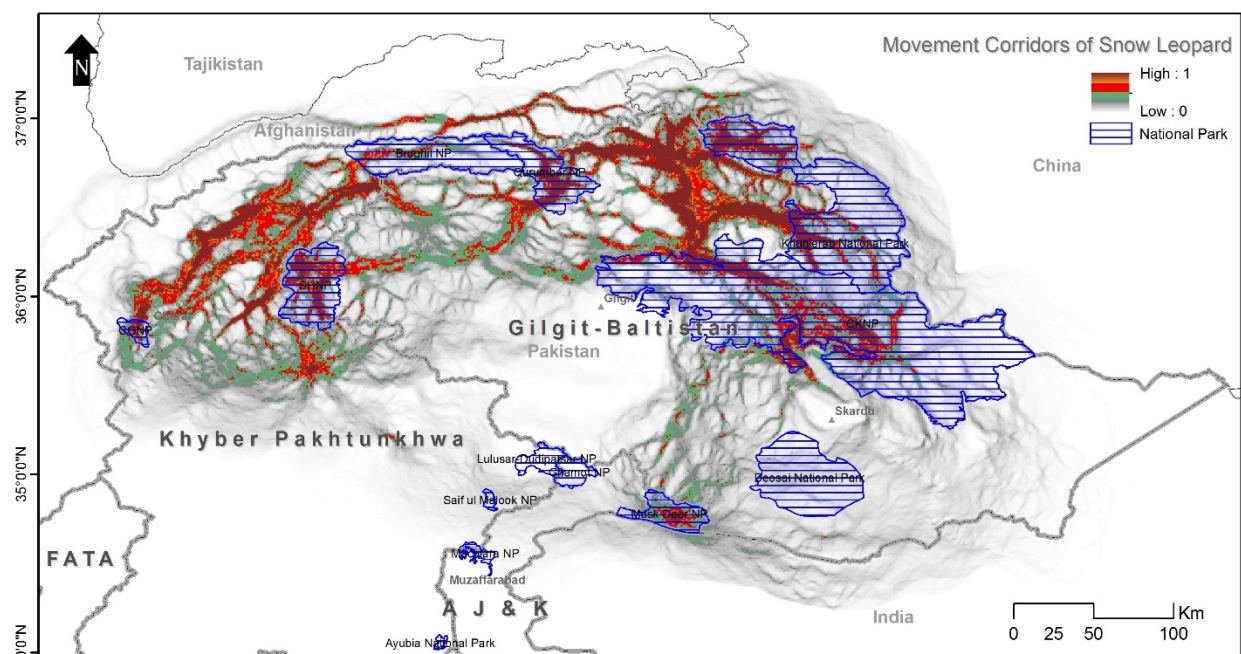

**Figure 10. Movement corridors between different National Parks.**

360 entries. Moreover, we surveyed over 25,000 km<sup>2</sup> which covered about 30% of known snow  
361 leopard range in Pakistan. In addition, we did not limit our surveys and model to just snow  
362 leopard range but extended it to a 30% buffer area to include potential areas that could possibly  
363 be favoured by snow leopards for their movement. The study showed that snow leopard presence  
364 is not restricted to its known range and that it possibly uses other areas as well. We discovered  
365 that numerous areas in the snow leopard range either have very low suitability or are unsuitable  
366 for its presence.

367         Although our dataset was vast, we used presence records only to predict the habitat  
368 suitability model as it has the advantage of being derived from different sources that can be  
369 combined to inform control projects [27]. This released us from the problems of unreliable  
370 absence records [38]. Modelling applications like Maxent [24] are highly suitable for predicting  
371 species' distribution based on available presence records without model under-fitting [15,53].  
372 This model, which is one of the most widely used ones to model species distributions, is a  
373 machine-learning method based on maximum entropy. Absence data is replaced with  
374 'background data' or 'pseudo-absences' which are a random sample of the available  
375 environment. Maxent estimates a target probability distribution by finding the probability  
376 distribution of maximum entropy and its logistic output can be used as a habitat suitability index  
377 [12,54].

378         We selected Maxent because it typically outperforms other methods based on predictive  
379 accuracy and the software is particularly easy to use [41,55]. Since becoming available in 2004,  
380 it has been utilized extensively to model species distributions [38]. Several studies were  
381 undertaken to compare the results of Maxent with other methods and it was found that Maxent  
382 predicted suitable areas better than regularized logistic regressions based on the expert-based

383 landscape classification [27]. Maxent was also used to predict the distribution of snow leopard in  
384 various countries [52,56].

385         This study showed that most of the snow leopard's habitat is patchy, having no or weak  
386 links with other areas. Though, there are potential movement corridors between different areas,  
387 e.g., between KNP and CKNP, but these are not strong enough to be called permanent routes  
388 (Figure 3.12). The connectivity model also revealed that in some areas, snow leopard possibly  
389 favoured movement across borders instead of inside Pakistan, e.g., Broghil National Park had  
390 more connectivity to Afghanistan than to its adjacent national park, Qurumber National Park.  
391 Also, KNP and CKNP did not show any connectivity at their shared border, but there is a  
392 movement corridor between these two parks on the other side. These connectivity patterns seem  
393 unusual on maps, but other factors like the presence of large glaciers explain the absence of any  
394 movement corridors at the borders of these parks. This connectivity model proposed by McRae  
395 et al. [32] from electrical circuit theory is a useful addition to the approaches available to  
396 ecologists and conservation planners. Circuit theory can be applied to predict the movement  
397 patterns and probabilities of successful dispersal or mortality of random walkers moving across  
398 complex landscapes, to generate measures of connectivity or isolation of habitat patches,  
399 populations, or protected areas, and to identify important connective elements (e.g., corridors)  
400 for conservation planning [32]. The establishment of movement corridors can offset the negative  
401 effects of habitat fragmentation by connecting isolated habitat populations or patches [57,58].

402         Our habitat suitability model was also useful for assessing the coverage of protected  
403 areas, specifically national parks in the snow leopard's habitat. Although a lot of suitable snow  
404 leopard area falls in national parks, there are still many areas that need to be included in the  
405 protected areas network (**Fig 9**), in order to safeguard longterm future of the species. Misgar and



406 Chapursan falling between KNP and Qurumber National Park are some of the most suitable  
407 areas for snow leopards that need protection. Areas on the eastern side of CKNP are also not  
408 protected. Qurumber National Park is unique in the sense that its entire area is favourable for  
409 snow leopards. But there should be a new protected area or extension of Qurumber National Park  
410 on its southern and southwest side. Yasin Valley is another important area adjacent to the  
411 southern side of Broghil National Park that requires protection. The upper part of Chitral district  
412 in KP province is also suitable for snow leopards yet in need of protection.

### 413 **Recommendations**

414 The Global Snow Leopard Ecosystem Protection Program (GSLEP) is joint initiative of 12 snow  
415 leopard range countries, established to safeguard snow leopards and their the vast ecosystem.  
416 The overall aim of GSLEP is to secure at least 20 snow leopard landscapes (SLL) across the  
417 cat's range [33]. Among these 20 model landscapes, three were proposed in Pakistan. Each SLL  
418 is defined as an area that can support at least 100 snow leopards of breeding age, has adequate  
419 and stable prey populations, and has functional connectivity to other snow leopard landscapes,  
420 including across international boundaries [33]. However, in reality, the definition of these  
421 landscapes are theoretical, and their boundaries are marked on limited information except for few  
422 areas where empirical data were available. Current study allows us to propose three model  
423 landscapes to be included in the GSLEP agenda, based on habitat suitability of the snow leopards  
424 across Pakistan. They are named after mountain ranges they fall in; Himalaya, Karakoram-  
425 Pamir and Hindukush (**Fig 11**). We also recommend Government of Pakistan to establish new  
426 national parks to protect critical habitats of snow leopards falling in Misgar, Chuparson and  
427 Terichmir areas in Gilgit-Baltistan and Chitral.

428

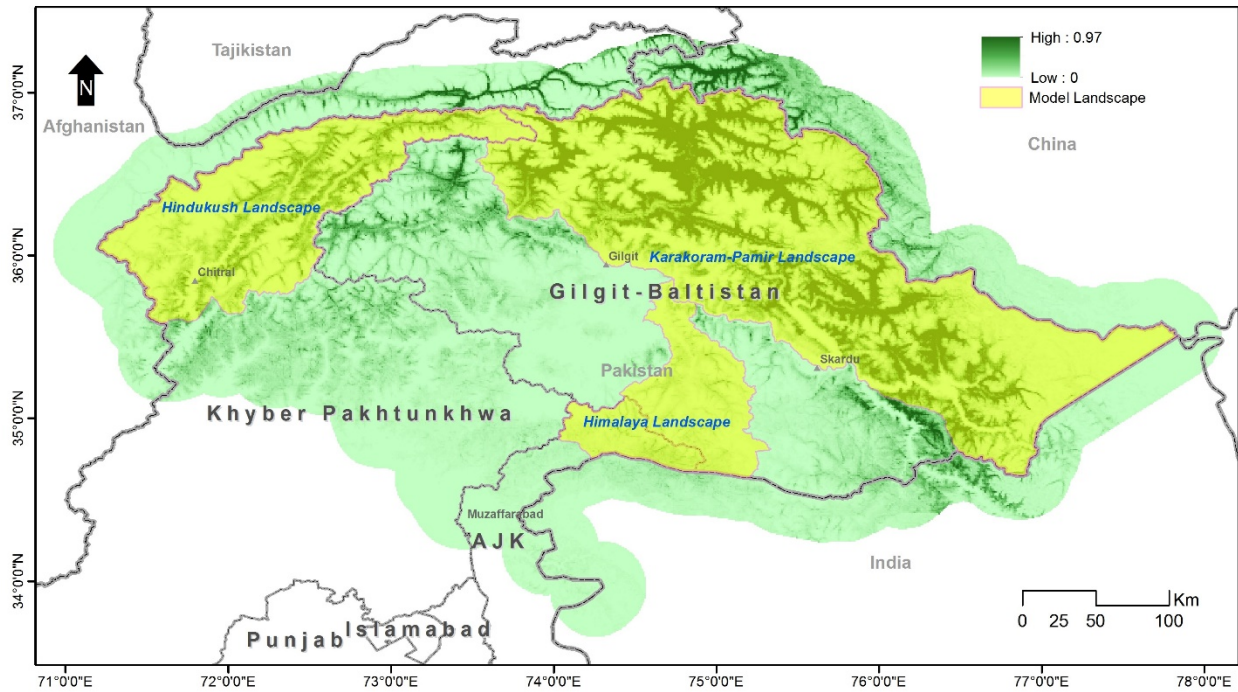

429 **Fig 11. Recommended model landscapes for GSLEP**

## 430 **Acknowledgments**

431 The logistics support provided by provincial wildlife departments of Gilgit-Baltistan, Khyber  
432 Pakhtunkhwa, and Azad Jammu and Kashmir, and local communities is highly appreciable. We  
433 acknowledge the support of Snow Leopard Foundation for field work in terms of equipment and  
434 trained field staff. We are highly grateful to Muhammad Ayoub, Khurshid Ali Shah, and Siraj  
435 Khan to help in field work specially camera trapping and sign surveys). We are thankful to Doost  
436 Ali and Center for Nature and Society, Peking University for providing much needed GIS  
437 support and data. Shakeel Ahmad helped in formatting and editing.

## 438 **References**

- 439 1. Alexander JS, Cusack JJ, Pengju C, Kun S, Riordan P. Conservation of snow leopards:  
440 Spill-over benefits for other carnivores? *Oryx*. 2016;50: 239–243.  
441 doi:10.1017/S0030605315001040
- 442 2. Jackson R, Mallon D, McCarthy T, Chundaway RA, Habib B. *Panthera uncia*. IUCN Red  
443 List Threat Species. 2008.
- 444 3. Nowell K, Jackson P. Wild cats: status survey and conservation action plan. IUCN Gland;  
445 1996.
- 446 4. Hussain S. The status of the snow leopard in Pakistan and its conflict with local farmers.  
447 *Oryx*. 2003;37: 26–33. doi:10.1017/S0030605303000085
- 448 5. Network SL. Snow leopard survival strategy. Seattle, Washington, USA. 2014; 1–145.
- 449 6. McCarthy T, Mallon D, Jackson R, Zahler P, McCarthy K. *Panthera uncia*. The IUCN Red  
450 List of Threatened Species 2017: e. T22732A50664030. 2017.
- 451 7. Fox J. Snow leopard conservation in the wild-a comprehensive perspective on a low  
452 density and highly fragmented population. *Proc Seventh Int Snow Leopard Symp*. 1994;  
453 3–15.  
454 +a+comprehensive+perspective+on+a+low+density+and+highly+fragmented+population  
455 #0
- 456 8. Jackson RM, Hunter DO. Snow leopard survey and conservation handbook. International  
457 Snow Leopard Trust; 1996.

- 458 9. Maheshwari A. Snow leopard (*Panthera uncia*) surveys in the Western Himalayas, India. *J*  
459 *Ecol Nat Environ*. 2013;5: 303–309. doi:10.5897/jene2013.0382
- 460 10. Roberts TJ, d'Olanda.) B (principe. *The mammals of Pakistan*. 1977.
- 461 11. Fox JL. A review of the status and ecology of the snow leopard. *Panthera uncia*. 1989;40.
- 462 12. Phillips S. Transferability, sample selection bias and background data in presence-only  
463 modelling: a response to Peterson et al. (2007). *Ecography (Cop)*. 2008;0:  
464 080227084236895–0. doi:10.1111/j.2007.0906-7590.05378.x
- 465 13. Fourcade Y, Engler JO, Rödder D, Secondi J. Mapping species distributions with  
466 MAXENT using a geographically biased sample of presence data: A performance  
467 assessment of methods for correcting sampling bias. *PLoS One*. 2014;9: 1–13.  
468 doi:10.1371/journal.pone.0097122
- 469 14. Yackulic CB, Chandler R, Zipkin EF, Royle JA, Nichols JD, Campbell Grant EH, et al.  
470 Presence-only modelling using MAXENT: When can we trust the inferences? *Methods*  
471 *Ecol Evol*. 2013;4: 236–243. doi:10.1111/2041-210x.12004
- 472 15. Baldwin RA. Use of maximum entropy modeling in wildlife research. *Entropy*. 2009;11:  
473 854–866. doi:10.3390/e11040854
- 474 16. Syfert MM, Smith MJ, Coomes DA. The Effects of Sampling Bias and Model Complexity  
475 on the Predictive Performance of MaxEnt Species Distribution Models. *PLoS One*.  
476 2013;8. doi:10.1371/journal.pone.0055158
- 477 17. Bentlage B, Peterson AT, Barve N, Cartwright P. Plumbing the depths: Extending  
478 ecological niche modelling and species distribution modelling in three dimensions. *Glob*

- 479 Ecol Biogeogr. 2013;22: 952–961. doi:10.1111/geb.12049
- 480 18. Reddy MT, Begum H, Sunil N, Pandravada SR, Sivaraj N, Kumar S. Mapping the Climate  
481 Suitability Using MaxEnt Modeling Approach for Ceylon Spinach (*Basella alba* L.)  
482 Cultivation in India. *J Agric Sci*. 2015;10: 87. doi:10.4038/jas.v10i2.8054
- 483 19. Elith J, H. Graham C, P. Anderson R, Dudik M, Ferrier S, Guisan A, et al. Novel methods  
484 improve prediction of species’ distributions from occurrence data. *Ecography (Cop)*.  
485 2006;29: 129–151. doi:10.1111/j.2006.0906-7590.04596.x
- 486 20. Sun WT, Liu YT. Research progress of risk analysis of biological invasion. *Chin Agr Sci*  
487 *Bull*. 2010;26: 233–236.
- 488 21. Yun-sheng W, Bing-yanl X, Fang-hao W, Qi-ming X, Liang-ying D. ScienceDirect The  
489 Potential Geographic Distribution of *Radopholus similis* in China. *Agric Sci China*.  
490 2007;6: 1444–1449.
- 491 22. Renner IW, Warton DI. Equivalence of MAXENT and Poisson Point Process Models for  
492 Species Distribution Modeling in Ecology. *Biometrics*. 2013;69: 274–281.  
493 doi:10.1111/j.1541-0420.2012.01824.x
- 494 23. Kumar S, Graham J, West AM, Evangelista PH. Using district-level occurrences in  
495 MaxEnt for predicting the invasion potential of an exotic insect pest in India. *Comput*  
496 *Electron Agric*. 2014;103: 55–62. doi:10.1016/j.compag.2014.02.007
- 497 24. Phillips SJ, Anderson RP, Schapire RE. Maximum entropy modeling of species  
498 geographic distributions. *Ecol Modell*. 2006;190: 231–259.
- 499 25. Tyre AJ, Tenhumberg B, Field SA, Niejalke D, Parris K, Possingham HP. Improving

- 500 precision and reducing bias in biological surveys: Estimating false-negative error rates.  
501 *Ecol Appl.* 2003;13: 1790–1801. doi:10.1890/02-5078
- 502 26. MacKenzie DI, Nichols JD, Lachman GB, Droege S, Andrew Royle J, Langtimm CA.  
503 Estimating site occupancy rates when detection probabilities are less than one. *Ecology.*  
504 2002;83: 2248–2255.
- 505 27. Dicko AH, Lancelot R, Seck MT, Guerrini L, Sall B, Lo M, et al. Using species  
506 distribution models to optimize vector control in the framework of the tsetse eradication  
507 campaign in Senegal. *Proc Natl Acad Sci U S A.* 2014;111: 10149–10154.  
508 doi:10.1073/pnas.1407773111
- 509 28. Ricketts TH. The matrix matters: Effective isolation in fragmented landscapes. *Am Nat.*  
510 2001;158: 87–99. doi:10.1086/320863
- 511 29. Damschen EI, Haddad NM, Orrock JL, Tewksbury JJ, Levey DJ. Corridors increase plant  
512 species richness at large scales. *Science* (80- ). 2006;313: 1284–1286.  
513 doi:10.1126/science.1130098
- 514 30. Beier P, Penrod K, Luke C, Spencer W, Cabañero C. South Coast Missing Linkages:  
515 restoring connectivity to wildlands in the largest metropolitan area in the United States.  
516 *Connect Conserv.* 2006; 555–586.
- 517 31. Kareiva P. Introduction: evaluating and quantifying the conservation dividends of  
518 connectivity. *Conserv Biol Ser.* 2006;14: 293.
- 519 32. McRae BH, Dickson BG, Keitt TH, Shah VB. Using circuit theory to model connectivity  
520 in ecology, evolution, and conservation. *Ecology.* 2008;89: 2712–2724.

- 521 33. Zakharenka, A., K. Sharma, C. Kochorov BR and KV et al. The Global Snow Leopard  
522 and Ecosystem Protection Program. In: Snow Leopards, McCarthy, T. and D. Mallon  
523 (Eds.). Acad Press London. 2016; pp: 559-573.
- 524 34. Thomas M. GCM. Snow Leopard Survival Strategy Seattle, USA: International Snow  
525 Leopard Trust and Snow Leopard Network: 108 pp. 2003; 108.
- 526 35. Karanth KU, Nichols JD. Estimation of tiger densities in India using photographic  
527 captures and recaptures. *Ecology*. 1998;79: 2852–2862. doi:10.1890/0012-  
528 9658(1998)079[2852:EOTDII]2.0.CO;2
- 529 36. Jackson RM, Roe JD, Wangchuk R, Hunter DO. Estimating snow leopard population  
530 abundance using photography and capture-recapture techniques. *Wildl Soc Bull*. 2006;34:  
531 772–781.
- 532 37. Kabir M, Hameed S, Ali H, Bosso L, Din JU, Bischof R, et al. Habitat suitability and  
533 movement corridors of grey wolf (*Canis lupus*) in Northern Pakistan. *PLoS One*. 2017;12:  
534 e0187027.
- 535 38. Elith J, Phillips SJ, Hastie T, Dudík M, Chee YE, Yates CJ. A statistical explanation of  
536 MaxEnt for ecologists. *Divers Distrib*. 2011;17: 43–57.
- 537 39. Shehzad W, Riaz T, Nawaz MA, Miquel C, Poillot C, Shah SA, et al. Carnivore diet  
538 analysis based on next-generation sequencing: Application to the leopard cat (*Prionailurus*  
539 *bengalensis*) in Pakistan. *Mol Ecol*. 2012;21: 1951–1965. doi:10.1111/j.1365-  
540 294X.2011.05424.x
- 541 40. Shehzad W, McCarthy TM, Pompanon F, Purevjav L, Coissac E, Riaz T, et al. Prey

- 542 preference of snow leopard (*Panthera uncia*) in South Gobi, Mongolia. *PLoS One*. 2012;7:  
543 e32104.
- 544 41. Merow C, Smith MJ, Silander JA. A practical guide to MaxEnt for modeling species'  
545 distributions: What it does, and why inputs and settings matter. *Ecography (Cop)*.  
546 2013;36: 1058–1069. doi:10.1111/j.1600-0587.2013.07872.x
- 547 42. Summers DM, Bryan BA, Crossman ND, Meyer WS. Species vulnerability to climate  
548 change: Impacts on spatial conservation priorities and species representation. *Glob Chang*  
549 *Biol*. 2012;18: 3268. doi:10.1111/j.1365-2486.2012.02771.x
- 550 43. DeLong ER, DeLong DM, Clarke-Pearson DL. Comparing the areas under two or more  
551 correlated receiver operating characteristic curves: a nonparametric approach. *Biometrics*.  
552 1988; 837–845.
- 553 44. Franklin J. Mapping species distributions: spatial inference and prediction. Cambridge  
554 University Press; 2010.
- 555 45. Shrestha UB, Bawa KS. Impact of climate change on potential distribution of Chinese  
556 caterpillar fungus (*Ophiocordyceps sinensis*) in Nepal Himalaya. *PLoS One*. 2014;9: 1–  
557 10. doi:10.1371/journal.pone.0106405
- 558 46. Engler R, Guisan A, Rechsteiner L. An improved approach for predicting the distribution  
559 of rare and endangered species from occurrence and pseudo-absence data. *J Appl Ecol*.  
560 2004;41: 263–274. doi:10.1111/j.0021-8901.2004.00881.x
- 561 47. Fielding AH, Bell JF. A review of methods for the assessment of prediction errors in  
562 conservation presence/absence models. *Environ Conserv*. 1997;24: 38–49.



- 563 48. Slater H, Michael E. Predicting the current and future potential distributions of lymphatic  
564 filariasis in africa using maximum entropy ecological niche modelling. PLoS One. 2012;7.  
565 doi:10.1371/journal.pone.0032202
- 566 49. McRae BH, Shah VB. Circuitscape user's guide. Univ California, St Barbar. 2009.
- 567 50. Brown JL. SDMtoolbox: a python-based GIS toolkit for landscape genetic ,  
568 biogeographic and species distribution model analyses. 2014; 694–700. doi:10.1111/2041-  
569 210X.12200
- 570 51. Boria RA, Olson LE, Goodman SM, Anderson RP. Spatial filtering to reduce sampling  
571 bias can improve the performance of ecological niche models. Ecol Modell. 2014;275:  
572 73–77. doi:10.1016/j.ecolmodel.2013.12.012
- 573 52. Aryal A, Shrestha UB, Ji W, Ale SB, Shrestha S, Ingty T, et al. Predicting the  
574 distributions of predator (snow leopard) and prey (blue sheep) under climate change in the  
575 Himalaya. Ecol Evol. 2016;6: 4065–4075.
- 576 53. Raes N, ter Steege H. A null-model for significance testing of presence-only species  
577 distribution models. Ecography (Cop). 2007;30: 727–736.
- 578 54. Halvorsen R. A strict maximum likelihood explanation of MaxEnt, and some implications  
579 for distribution modelling. Sommerfeltia. 2013;36: 1–132.
- 580 55. Terribile LC, Diniz-Filho JAF. How many studies are necessary to compare niche-based  
581 models for geographic distributions? Inductive reasoning may fail at the end. Brazilian J  
582 Biol. 2010;70: 263–269.
- 583 56. Li J, Wang D, Yin H, Zhaxi D, Jiagong Z, Schaller GB, et al. Role of Tibetan Buddhist

- 584 monasteries in snow leopard conservation. *Conserv Biol.* 2014;28: 87–94.
- 585 57. Downes SJ, Handasyde KA, Elgar MA. The Use of Corridors by Mammals in Fragmented  
586 Australian Eucalypt Forests: Uso de Corredores por Mamíferos en Bosques de Eucalipto  
587 en Australia. *Conserv Biol.* 1997;11: 718–726.
- 588 58. Wang F, McShea WJ, Wang D, Li S, Zhao Q, Wang H, et al. Evaluating landscape  
589 options for corridor restoration between giant panda reserves. *PLoS One.* 2014;9:  
590 e105086.
- 591
